# Supplementary material for: Schroth Physiotherapeutic Scoliosis-Specific Exercises Added to the Standard of Care Lead to Better Cobb Angle Outcomes in Adolescents with Idiopathic Scoliosis – an Assessor and Statistician Blinded Randomized Controlled Trial
Source: PLoS One. 2016 Dec 29;11(12):e0168746. doi: 10.1371/journal.pone.0168746 (PMC5198985; doi:10.1371/journal.pone.0168746)
Supplement: S2 File — (XLSX) [file pone.0168746.s003.xlsx]

## Sheet: Cobb angles
ID	Group	Classification_Code	Age	Gender	Height_m	Weight_kg	Brace	Visit	Sum_of_Cobb	Largest_Cobb	SEQ
1	0	1	12	1	1.66	52.16		1	28.2	14.4	36
1	0	1	12	1	1.66	52.16		2	31.1	16.6	37
2	1	4	10	1	1.4	36.74		1	18	18	36
2	1	4	10	1	1.4	36.74		2	16.5	16.5	34
3	1	4	15	1	1.65	44		1	74.1	30.5	37
3	1	4	15	1	1.65	44		2	73.4	30.8	28
4	0	4	14	1	1.55	51.6		1	37.6	22.7	28
4	0	4	14	1	1.55	51.6		2			32
5	0	2	15	1	1.7	71.1		1	92.6	42	30
5	0	2	15	1	1.7	71.1		2
6	0	4	13	1	1.65	51.7		1	36.5	19.2
6	0	4	13	1	1.65	51.7		2	23.1	12.1
7	1	2	17	1	1.68	51.7		1	53.9	30	30
7	1	2	17	1	1.68	51.7		2	52.1	29	30
8	1	2	14	1	1.52	35.4		1	69.7	31.9	28
8	1	2	14	1	1.52	35.4		2	66.6	30.8	28
9	1	4	14	1	1.63	45.4		1	50.6	37	28
9	1	4	14	1	1.63	45.4		2	42.3	29	29
10	1	4	15	1	1.8	64.9		1	66	25.6	40
10	1	4	15	1	1.8	64.9		2	66.7	27	37
11	0	3	14	1	1.62	47.6		1	11.7	11.7	37
11	0	3	14	1	1.62	47.6		2	15.8	15.8	24
12	0	4	13	1	1.565	53.5		1	63.3	39.4	30
12	0	4	13	1	1.565	53.5		2	68.6	41.2	29
13	0	4	14	1	1.55	48.1		1	56.6	30	26
13	0	4	14	1	1.55	48.1		2			32
14	0	2	12	1	1.49	34.6		1	30.5	15.7	33
14	0	2	12	1	1.49	34.6		2	39.5	20.9	28
15	1	2	16	1	1.68	53.5		1	64.6	42	26
15	1	2	16	1	1.68	53.5		2	62	41	22
16	0	2	14	1	1.5	46.5		1	79.7	30	36
16	0	2	14	1	1.5	46.5		2	82.1	31.6	31
17	0	4	15	1	1.57	47.5		1	36.6	23.6	32
17	0	4	15	1	1.57	47.5		2	46.6	31	33
18	1	4	16	1	1.6	48.4		1	59.2	37.9	34
18	1	4	16	1	1.6	48.4		2	54	35	36
19	1	1	12	1	1.53	43.4		1	50	22.7	32
19	1	1	12	1	1.53	43.4		2	28.7	16.5	24
20	1	4	14	0	1.77	54.1		1	24	24
20	1	4	14	0	1.77	54.1		2	18.7	18.7	34
21	0	2	16	1	1.65	57.9		1	89	39	33
21	0	2	16	1	1.65	57.9		2	86.6	37.3	33
22	1	1	12	0	1.56	35.5		1	33.9	17.4	28
22	1	1	12	0	1.56	35.5		2	35.2	18.2	32
23	0	4	13	1	1.66	51.4		1	48.4	31.8	33
23	0	4	13	1	1.66	51.4		2	43.2	30	37
24	1	2	13	1	1.65	53.9		1	57.7	22.5	37
24	1	2	13	1	1.65	53.9		2	48	20	37
25	0	4	13	1	1.54	41.7		1	37.2	22.7	35
25	0	4	13	1	1.54	41.7		2	34.7	22.5	37
26	0	2	12	1	1.58	47.7		1	69.1	36.1	37
26	0	2	12	1	1.58	47.7		2			33
27	0	1	12	1	1.59	52.1		1	63.3	26.9	36
27	0	1	12	1	1.59	52.1		2	68.9	27	36
28	1	3	14	1	1.65	47.9		1	11.3	11.3	33
28	1	3	14	1	1.65	47.9		2	14.4	14.4	28
29	1	4	12	1	1.6	43.8		1	29.6	29.6	27
29	1	4	12	1	1.6	43.8		2	27	27	33
30	0	2	13	1	1.59	44.9		1	68	34.5	32
30	0	2	13	1	1.59	44.9		2	81.3	38.3	32
31	0	3	14	1	1.72	68.8		1	34.7	19.9	37
31	0	3	14	1	1.72	68.8		2	47.7	31.2	31
32	1	2	15	1	1.66	50.2		1	78.4	36.2	32
32	1	2	15	1	1.66	50.2		2	75.2	32.7	38
33	0	1	15	1	1.67	57.7		1	57.4	22.6	36
33	0	1	15	1	1.67	57.7		2	49.4	21.8	36
34	1	2	12	1	1.515	41.3		1	58.3	37.6	25
34	1	2	12	1	1.515	41.3		2	57.5	35.5	27
35	1	3	13	1	1.63	48.2		1	25.3	25.3	22
35	1	3	13	1	1.63	48.2		2	21.5	21.5	39
36	1	2	13	1	1.52	44.4		1	67.2	37.8	33
36	1	2	13	1	1.52	44.4		2
37	1	1	10	1	1.38	29.3		1	13.9	13.9	34
37	1	1	10	1	1.38	29.3		2	21.2	21.2	27
38	1	4	12	1	1.5	32.5		1	67.9	36.8	31
38	1	4	12	1	1.5	32.5		2	62.4	37.4	24
39	1	4	14	0	1.69	49.7		1	38.5	25.6	20
39	1	4	14	0	1.69	49.7		2			22
40	0	2	12	1	1.59	45		1	30.6	30.6	35
40	0	2	12	1	1.59	45		2			28
41	0	1	11	1	1.59	58.1		1	73.4	28.1	27
41	0	1	11	1	1.59	58.1		2	89.2	32	32
42	0	4	15	1	1.75	48.5		1	53.8	37.5	36
42	0	4	15	1	1.75	48.5		2	52.6	37.6	37
43	0	4	10	1	1.46	52.27		1	81.5	40.6	30
43	0	4	10	1	1.46	52.27		2	102.4	44.7	35
44	1	3	12	1	1.52	42.5		1	86	44.3	27
44	1	3	12	1	1.52	42.5		2	80.6	43	25
45	0	2	16	1	1.63	54.1		1	95.1	35.6	35
45	0	2	16	1	1.63	54.1		2	91.4	34	39
46	0	4	12	1	1.57	40.6		1	36.9	18.6	35
46	0	4	12	1	1.57	40.6		2	38.6	25.3	35
47	1	4	14	1	1.57	52.5		1	27	27	36
47	1	4	14	1	1.57	52.5		2	20.3	20.3	34
48	0	4	13	1	1.52	38.5		1	45.2	24.3	33
48	0	4	13	1	1.52	38.5		2	57	31.8	33
49	1	4	15	1	1.66	49.5		1	23.2	23.2	33
49	1	4	15	1	1.66	49.5		2	42	26.8	34
50	1	4	13	1	1.62	48	0	1	55.4	39.4	33
50	1	4	13	1	1.62	48	0	2	64.3	43.9	30
Notes:
1. Group was coded as follows: 0 = Standard of care and 1 = Schroth + standard of care
2. Classification has been coded as follows: 1=3c, 2=3cp, 3=4c and 4=4cp.
3. Brace was coded as 0 = no brace, and 1 = yes brace
4. SEQ are the scores on Self-efficacy questionnaire (max 40)

## Sheet: Sheet1
ID	Group	Largest_Cobb	Visit
1	0	14.4	1						Time	N	Predicted ITT	SE	SD	N	Predicted PP	SE	SD
4	0	22.7	1		Mean of control =	27.9		Control	1	25	20.86	3.45	17.25	25	19.65	3.43
5	0	42	1		Mean of Schroth =	29.1			2	25	23.18	3.48	17.4	20	21.96	3.48
6	0	19.2	1					Schroth	1	25	24.2	3.25	16.25	25	24.52	3.22
11	0	11.7	1						2	25	22.99	3.28	16.4	23	22.7	3.27
12	0	39.4	1		Control 6 months =	29.135
13	0	30	1		Schroth 6 months =	27.6609
14	0	15.7	1
16	0	30	1
17	0	23.6	1
21	0	39	1			1.235
23	0	31.8	1
25	0	22.7	1			-1.43913
26	0	36.1	1
27	0	26.9	1
30	0	34.5	1
31	0	19.9	1
33	0	22.6	1		SD = SE/SQRT(1/Ne)+(1/Nc) =
40	0	30.6	1
41	0	28.1	1		SD=SE * SQRT(n)
42	0	37.5	1
43	0	40.6	1
45	0	35.6	1
46	0	18.6	1
48	0	24.3	1
2	1	18	1
3	1	30.5	1
7	1	30	1
8	1	31.9	1
9	1	37	1
10	1	25.6	1
15	1	42	1
18	1	37.9	1
19	1	22.7	1
20	1	24	1
22	1	17.4	1
24	1	22.5	1
28	1	11.3	1
29	1	29.6	1
32	1	36.2	1
34	1	37.6	1
35	1	25.3	1
36	1	37.8	1
37	1	13.9	1
38	1	36.8	1
39	1	25.6	1
44	1	44.3	1
47	1	27	1
49	1	23.2	1
50	1	39.4	1
1	0	16.6	2
4	0		2
5	0		2
6	0	12.1	2
11	0	15.8	2
12	0	41.2	2
13	0		2
14	0	20.9	2
16	0	31.6	2
17	0	31	2
21	0	37.3	2
23	0	30	2
25	0	22.5	2
26	0		2
27	0	27	2
30	0	38.3	2
31	0	31.2	2
33	0	21.8	2
40	0		2
41	0	32	2
42	0	37.6	2
43	0	44.7	2
45	0	34	2
46	0	25.3	2
48	0	31.8	2
2	1	16.5	2
3	1	30.8	2
7	1	29	2
8	1	30.8	2
9	1	29	2
10	1	27	2
15	1	41	2
18	1	35	2
19	1	16.5	2
20	1	18.7	2
22	1	18.2	2
24	1	20	2
28	1	14.4	2
29	1	27	2
32	1	32.7	2
34	1	35.5	2
35	1	21.5	2
36	1		2
37	1	21.2	2
38	1	37.4	2
39	1		2
44	1	43	2
47	1	20.3	2
49	1	26.8	2
50	1	43.9	2
Notes:
1. Group was coded as follows: 0 = Standard of care and 1 = Schroth + standard of care
2. Classification has been coded as follows: 1=3c, 2=3cp, 3=4c and 4=4cp.
3. Brace was coded as 0 = no brace, and 1 = yes brace
4. SEQ are the scores on Self-efficacy questionnaire (max 40)
